# Supplementary material for: Crystallite fusion in nanocellulose aggregates
Source: Research Square preprint supplement (doi:10.21203/rs.3.rs-518217/v1), 2021-05-18
Supplement: Supplementary file 1 [file 6408d0b6b3a349f60a38f4f0.docx]

**Supplementary Information**

**Crystallite fusion in nanocellulose aggregates**

Kazuho Daicho1*, Kayoko Kobayashi2, Shuji Fujisawa1, and Tsuguyuki Saito1*

1Department of Biomaterial Sciences, Graduate School of Agricultural and Life Sciences, The University of Tokyo, 1-1-1 Yayoi, Bunkyo-ku, Tokyo 113-8657, Japan

2Division of Forest and Biomaterials Science, Graduate School of Agriculture, Kyoto University, Sakyo-ku, Kyoto 606-8502, Japan

*Corresponding author. E-mail: kdaicho@g.ecc.u-tokyo.ac.jp, saitot@g.ecc.u-tokyo.ac.jp

This file includes Supplementary Figures S1–S8.

**Figure S1.** (**a**) FTIR spectra of samples *i*–*iv*, and (**b**, **c**) the deference spectra obtained by subtracting the FTIR spectrum of sample *iii* from that of sample *iv* in the (**b**) OH and (**c**) C=O regions. The absorption at ~1720 cm−1 was assigned to the C=O stretching of the surface carboxy groups forming hydrogen bonds1, and the red shifting in the deference spectra showed that the hydrogen bonds in sample *iv* were stronger than those in sample *iii*.

**Figure S2.** (**a**) XRD diagram of samples *i*–*iv* set parallel to the beam. The DO values show the degree of orientation calculated from the diagrams.

**Figure S3.** Nitrogen adsorption–desorption isotherm of sample *i*.

**Figure S4.** Repeatability of the crystallinity recovery. Sample *iii* was disintegrated into CNFs in water, and dried again through the same freeze-drying process as adopted in the preparation of sample *i*; thus, it is coded here as reproduced sample *i*, re-*i*. The sample re-*i* was then swelled in water and dried again through the same drying process as adopted in the preparation of samples *iii*; thus, it is coded here as reproduced sample *iii*, re-*iii*. (**a**) XRD profiles and (**b**) CP/MAS 13C NMR spectra of samples *i*, *iii*, re-*i*, and re-*iii*. (**c**) Crystal sizes of the (2 0 0) plane calculated from the XRD profiles. (**d**) Crystallinity indices of the C4 and C6 carbon atoms calculated from the NMR spectra.

**Figure S5.** Crystallinity recovery of the chemically unmodified CNFs. The CNFs were produced from a raw pulp solely by wet disintegration. These CNFs were assembled through the same drying process as adopted in the preparation of samples *i*, *ii*, and *iv*; thus, they are coded here as samples *i’*, *ii’*, and *iv’*, respectively. (**a**) XRD profiles and (**b**) CP/MAS 13C NMR spectra of the raw pulp and samples *i’*, *ii’*, and *iv’*. (**c**) Crystal sizes of the (2 0 0) plane calculated from the XRD profiles. (**d**) Crystallinity indices of the C4 and C6 carbon atoms calculated from the NMR spectra.

**Figure S6.** Crystallinity recovery of α-chitin fibrils. The chitin fibrils were dispersed in water according to a previous report2, and were then assembled through the same drying process as adopted in the preparation of samples *i*, *ii*, and *iv*; thus, they are coded here as chitin *i*, *ii*, and *iv*, respectively. (**a**) XRD profiles of chitin *i*, *ii*, and *iv*. (**b**) Crystal sizes of the (0 2 0) plane calculated from the XRD profiles.

**Figure S7.** (**a**) Comparison of the XRD profile of sample *iv* with the simulated profiles of (**b**) the antiparallel CNF models #1–8.

**Figure S8.** (**a**) Thermal diffusivities, *α’*, and (**b**) conductivities, *k’*, divided by their bulk densities for samples *i*–*iv* as a function of the crystallinity index of the C4 carbon atoms.

**References**

1. Fujisawa, S., Okita, Y., Fukuzumi, H., Saito, T. & Isogai, A. Preparation and characterization of TEMPO-oxidized cellulose nanofibril films with free carboxyl groups. *Carbohydrate Polymers* **84**(1), 579-583, [doi:10.1016/j.carbpol.2010.12.029](https://www.sciencedirect.com/science/article/pii/S0144861710010064) (2011).
2. Kaku, Y., Fujisawa, S., Saito, T. & Isogai, A. Synthesis of Chitin Nanofiber-Coated Polymer Microparticles via Pickering Emulsion. *Biomacromolecules* **21**(5), 1886-1891, doi:[10.1021/acs.biomac.9b01757](https://doi.org/10.1021/acs.biomac.9b01757) (2020).
